# Supplementary material for: Effect of Renal Ischemia Reperfusion on Brain Neuroinflammation
Source: MDPI journal article supplement (doi:10.3390/biomedicines10112993), 2022-11-21
Supplement: s1 [file s1]

## Supplementary Data S1

**Table S1. Striatum, inflammatory cytokine**

|      | Cytokines     | Sham | IR 24 h   | IR 48 h   | Sham & IR 24 h | Sham & IR<br>48 h |
|------|---------------|------|-----------|-----------|----------------|-------------------|
| mRNA | c1q           | 1    | 2.98±0.44 | 2.46±0.17 | *              | n.s.              |
|      | il-1 $\alpha$ | 1    | 3.28±0.26 | 3.91±0.46 | **             | ##                |
|      | il-1 $\beta$  | 1    | 2.13±0.16 | 2.91±0.25 | n.s.           | #                 |
|      | tnfa          | 1    | 4.15±0.64 | 3.62±0.51 | ****           | ###               |
|      | IL-6          | 1    | 4.54±0.70 | 4.87±0.99 | ****           | ####              |

**Table S2. Striatum, Astrocytes**

| mRNA |           | Sham | IR 24 h   | IR 48 h   | Sham & IR 24 h  | Sham & IR 48 h |
|------|-----------|------|-----------|-----------|-----------------|----------------|
| PAN  | steap4    | 1    | 3.43±0.36 | 4.8±0.73  | ****            | ####           |
|      | s1pr3     | 1    | 2.14±0.12 | 2.59±0.27 | n.s.            | #              |
|      | hspb1     | 1    | 1.08±0.05 | 0.81±0.11 | n.s.            | n.s.           |
|      | cxc110    | 1    | 5.13±0.84 | 6.17±0.54 | ****            | ####           |
|      | osmr      | 1    | 2.49±0.08 | 2.96±0.19 | n.s.            | ##             |
|      | cp        | 1    | 2.88±0.19 | 4.86±0.98 | **              | ####           |
|      | serpina3n | 1    | 1.90±0.20 | 3.20±0.29 | n.s.            | ###            |
|      | aspg      | 1    | 3.07±0.42 | 2.92±0.12 | **              | #              |
|      | gfap      | 1    | 3.48±0.22 | 5.63±0.35 | ****            | ####           |
| mRNA |           | Sham | IR 24 h   | IR 48 h   | Sham & I R 24 h | Sham & IR 48 h |
| A1   | H2-T23    | 1    | 3.08±0.34 | 7.85±0.33 | ****            | ####           |
|      | Serp1g1   | 1    | 1.14±0.15 | 1.01±0.15 | n.s.            | n.s.           |
|      | H2-D1     | 1    | 3.21±0.11 | 4.94±0.43 | ****            | ####           |
|      | Ggtal1    | 1    | 3.45±0.31 | 4.33±0.99 | ****            | ####           |
|      | Ligp1     | 1    | 4.56±0.34 | 4.05±0.44 | ****            | ####           |
|      | Gbp2      | 1    | 1.22±0.07 | 0.69±0.07 | n.s.            | n.s.           |
|      | Fbln5     | 1    | 4.11±0.39 | 6.72±0.92 | ****            | ####           |
|      | Ugt1a     | 1    | 0.24±0.05 | 0.56±0.11 | n.s.            | n.s.           |
|      | Fkbp5     | 1    | 2.42±0.29 | 2.94±0.31 | *               | ####           |
|      | Psmb8     | 1    | 0.72±0.06 | 1.12±0.05 | n.s.            | n.s.           |
|      | Srgn      | 1    | 2.18±0.21 | 3.76±0.29 | n.s.            | #              |
| mRNA |           | Sham | IR 24 h   | IR 48 h   | Sham & IR 24 h  | Sham & IR 48 h |
| A2   | Clefl     | 1    | 0.92±0.09 | 0.78±0.12 | n.s.            | n.s.           |
|      | Ptx3      | 1    | 1.60±0.11 | 0.87±0.08 | n.s.            | n.s.           |
|      | S100a10   | 1    | 1.19±     | 1.04±0.11 | n.s.            | n.s.           |
|      | Cd109     | 1    | 2.13±0.17 | 1.28±0.11 | ****            | n.s.           |
|      | Ptgs2     | 1    | 0.80±0.07 | 1.04±0.12 | n.s.            | n.s.           |
|      | Emp1      | 1    | 1.91±0.11 | 1.87±0.10 | ***             | ##             |
|      | Slc10a6   | 1    | 2.89±0.18 | 0.47±0.11 | ****            | n.s.           |
|      | Tm4sf1    | 1    | 1.10±0.15 | 1.97±0.17 | n.s.            | ###            |

|  |     |   |           |           |      |      |
|--|-----|---|-----------|-----------|------|------|
|  | d14 | 1 | 1.04±0.02 | 1.04±0.06 | n.s. | n.s. |
|--|-----|---|-----------|-----------|------|------|

**Table S3. V.M Inflammatory cytokines**

| Cytokines     | Sham | IR 24 h   | IR 48 h   | Sham & IR<br>24h | Sham & IR<br>48h |
|---------------|------|-----------|-----------|------------------|------------------|
| Clq           | 1    | 4.7±0.30  | 3.44±0.51 | ****             | ###              |
| IL-1 $\alpha$ | 1    | 4.09±0.49 | 4.40±0.38 | ****             | ####             |
| IL-1 $\beta$  | 1    | 5.51±0.82 | 2.62±0.12 | ****             | n.s              |
| TNF- $\alpha$ | 1    | 1.98±0.08 | 2.88±0.35 | n.s              | #                |
| IL-6          | 1    | 3.17±0.62 | 4.53±0.44 | **               | ####             |

**Table S4.V.M Astrocytes**

| mRNA |           | Sham | IR 24 h   | IR 48 h    | Sham & I R<br>24h | Sham & IR<br>48h |
|------|-----------|------|-----------|------------|-------------------|------------------|
| PAN  | steap4    | 1    | 2.46±0.16 | 3.14±0.07  | *                 | ####             |
|      | s1pr3     | 1    | 4.86±0.45 | 3.26±0.06  | ****              | ####             |
|      | Timp1     | 1    | 2.18±0.24 | 1.38±0.06  | n.s.              | n.s.             |
|      | hspb1     | 1    | 6.76±0.63 | 3.79±0.78  | ****              | ####             |
|      | cxc110    | 1    | 3.11±0.33 | 3.21±0.06  | ****              | ####             |
|      | cd44      | 1    | 1.37±0.24 | 1.39±0.14  | n.s.              | n.s.             |
|      | osmr      | 1    | 3.26±0.45 | 1.69±0.14  | ****              | n.s.             |
|      | cp        | 1    | 1.73±0.17 | 1.20±0.05  | n.s.              | n.s.             |
|      | serpina3n | 1    | 2.90±0.17 | 1.26±0.18  | ***               | n.s.             |
|      | aspg      | 1    | 3.29±0.74 | 5.21±0.10  | ****              | ####             |
|      | gfap      | 1    | 2.75±0.47 | 5.64±0.87  | **                | ####             |
| A1   |           | Sham | IR 24 h   | IR 48 h    | Sham & IR<br>24h  | Sham & IR<br>48h |
|      | H2-T23    | 1    | 1.46±0.12 | 0.94±0.13  | n.s.              | n.s.             |
|      | Serping1  | 1    | 0.96±0.17 | 0.61±0.08  | n.s.              | n.s.             |
|      | H2-D1     | 1    | 5.79±0.81 | 3.36±0.44  | ****              | ####             |
|      | Ggta1     | 1    | 2.73±0.40 | 4.41±0.79  | **                | ####             |
|      | Ligp1     | 1    | 0.51±0.03 | 0.85±0.06  | n.s.              | n.s.             |
|      | Gbp2      | 1    | 1.13±0.04 | 1.51±0.12  | n.s.              | n.s.             |
|      | Fbln5     | 1    | 1.05±0.08 | 1.99±0.36  | n.s.              | n.s.             |
|      | Ugt1a     | 1    | 0.26±0.06 | 0.55±0.04  | n.s.              | n.s.             |
|      | Fkbp5     | 1    | 4.07±0.23 | 5.98±0.49  | ****              | ####             |
|      | Psm8      | 1    | 5.82±0.44 | 2.78±0.60  | ****              | ##               |
|      | Srgn      | 1    | 4.60±0.56 | 4.30±0.68  | ****              | ####             |
| A2   |           | Sham | IR 24 h   | IR 48 h    | Sham & IR<br>24h  | Sham & IR<br>48h |
|      | Clec1     | 1    | 0.35±0.11 | 0.8±0.16   | n.s               | n.s.             |
|      | Tgm1      | 1    | 2.00±0.19 | 1.23±0.005 | n.s               | n.s.             |
|      | Ptx3      | 1    | 0.70±0.06 | 0.78±0.09  | n..               | n.s.             |
|      | S100a10   | 1    | 0.86±0.09 | 1.46±0.13  | n.s.              | n.s.             |
|      | Sphk1     | 1    | 0.85±0.09 | 0.81±0.07  | n.s.              | n.s.             |
|      | Cd109     | 1    | 0.43±0.05 | 1.62±0.20  | n.s.              | n.s.             |

|  |         |   |            |           |      |      |
|--|---------|---|------------|-----------|------|------|
|  | Ptgs2   | 1 | 0.78±0.10  | 1.19±0.18 | n.s. | n.s. |
|  | Emp1    | 1 | 0.26±0.02  | 1.89±0.16 | n.s. | n.s. |
|  | Slc10a6 | 1 | 0.48±0.06  | 1.06±0.14 | n.s  | n.s. |
|  | Tm4sf1  | 1 | 1.27±0.006 | 1.11±0.07 | n.s  | n.s. |
|  | Cd14    | 1 | 0.23±0.03  | 0.85±0.07 | n.s  | n.s. |

**Table S5. HIP, Cytokines**

| mRNA | Cytokines     | Sham | IR 24 h   | IR 48 h   | Sham & IR 24h | Sham & IR 48h |
|------|---------------|------|-----------|-----------|---------------|---------------|
|      | Clq           | 1    | 2.04±0.21 | 4.24±0.24 | n.s.          | ####          |
|      | IL-1 $\alpha$ | 1    | 4.98±0.63 | 5.45±0.45 | ****          | ####          |
|      | IL-1 $\beta$  | 1    | 1.65±0.41 | 1.05±0.12 | n.s.          | n.s.          |
|      | TNF- $\alpha$ | 1    | 3.33±0.19 | 8.73±0.83 | ***           | ####          |
|      | IL-6          | 1    | 2.66±0.28 | 4.05±0.74 | n.s.          | ####          |

**Table S6. HIP, Astrocytes**

|     | mRNA      | Sham | IR 24 h   | IR 48 h   | Sham & IR<br>24 h | Sham & IR<br>48 h |
|-----|-----------|------|-----------|-----------|-------------------|-------------------|
| PAN | s1pr3     | 1    | 1.77±0.09 | 2.14±0.15 | n.s.              | ***               |
|     | Timp1     | 1    | 1.08±0.13 | 1.21±0.05 | n.s.              | n.s.              |
|     | hspb1     | 1    | 0.42±0.07 | 0.60±0.06 | n.s.              | n.s.              |
|     | cxcl10    | 1    | 3.27±0.11 | 4.37±0.31 | ****              | ####              |
|     | osmr      | 1    | 1.60±0.07 | 3.09±0.14 | n.s.              | ####              |
|     | cp        | 1    | 2.35±0.08 | 4.30±0.15 | ****              | ####              |
|     | serpina3n | 1    | 1.80±0.06 | 1.75±0.06 | *                 | n.s.              |
|     | aspg      | 1    | 3.97±0.42 | 3.65±0.51 | ****              | ####              |
|     | gfap      | 1    | 2.23±0.13 | 3.44±0.42 | ****              | ####              |
|     |           |      |           |           |                   |                   |
| A1  | H2-T23    | 1    | 1.59±0.16 | 3.20±0.27 | n.s.              | ####              |
|     | Serping1  | 1    | 2.34±0.12 | 4.31±0.56 | *                 | ####              |
|     | H2-D1     | 1    | 1.11±0.18 | 1.32±0.13 | n.s.              | n.s.              |
|     | Ggt1      | 1    | 2.19±0.16 | 3.63±0.35 | n.s.              | ####              |
|     | Ligp1     | 1    | 3.19±0.29 | 3.87±0.34 | ****              | ####              |
|     | Gbp2      | 1    | 2.14±0.12 | 3.41±0.14 | n.s.              | ####              |
|     | Fbln5     | 1    | 3.23±0.34 | 3.77±0.38 | ****              | ####              |
|     | Ugt1a     | 1    | 1.71±0.14 | 3.28±0.50 | n.s.              | ####              |
|     | Fkbp5     | 1    | 1.71±0.43 | 1.49±0.16 | n.s.              | n.s.              |
|     | Psm8      | 1    | 0.97±0.14 | 0.86±0.13 | n.s.              | n.s.              |
|     | Srgn      | 1    | 2.41±0.25 | 4.73±0.77 | **                | ####              |
| A2  | Clcf1     | 1    | 1.00±0.04 | 0.59±0.06 | n.s.              | n.s.              |
|     | Ptx3      | 1    | 2.03±0.16 | 1.16±0.13 | n.s.              | n.s.              |
|     | S100a10   | 1    | 1.24±0.05 | 1.36±0.11 | n.s.              | n.s.              |



|  |         |   |           |           |      |      |
|--|---------|---|-----------|-----------|------|------|
|  | Cd109   | 1 | 3.48±0.56 | 1.72±0.16 | **** | n.s. |
|  | Ptgs2   | 1 | 1.00±0.09 | 1.11±0.14 | n.s. | n.s. |
|  | Emp1    | 1 | 2.25±0.23 | 2.00±0.17 | *    | n.s. |
|  | Slc10a6 | 1 | 1.56±0.45 | 0.58±0.15 | n.s. | n.s. |
|  | Tm4sf1  | 1 | 1.16±0.04 | 2.21±0.42 | n.s. | #    |
|  | Cd14    | 1 | 1.84±0.25 | 1.95±0.17 | n.s. | n.s. |

**Table S7. Cytokines Cortex**

| mRNA | cytokines     | Sham | IR 24 h   | IR 48 h   | Sham & IR 24 h | Sham & IR 48 h |
|------|---------------|------|-----------|-----------|----------------|----------------|
|      | Clq           | 1    | 2.45±0.06 | 4.14±0.50 | n.s.           | ####           |
|      | IL-1 $\alpha$ | 1    | 4.76±0.68 | 2.88±0.08 | ****           | #              |
|      | TNF- $\alpha$ | 1    | 3.71±0.61 | 2.23±0.07 | ****           | n.s.           |
|      | C3            | 1    | 4.04±0.22 | 2.69±0.54 | ****           | #              |
|      | IL-6          | 1    | 5.95±0.80 | 4.17±0.76 | ****           | ####           |

**Table S8. Cortex Astrocytes**

|     | mRNA      | Sham | IR 24 h    | IR 48 h   | Sham & IR<br>24h | Sham & IR<br>48h |
|-----|-----------|------|------------|-----------|------------------|------------------|
| PAN | steap4    | 1    | 5.04±0.72  | 4.44±0.40 | ****             | ####             |
|     | s1pr3     | 1    | 1.57±0.02  | 2.39±0.15 | n.s.             | #                |
|     | Timp1     | 1    | 2.17±10.04 | 2.24±0.04 | n.s.             | n.s.             |
|     | hspb1     | 1    | 2.32±0.16  | 4.07±0.12 | n.s.             | ####             |
|     | cxcl10    | 1    | 3.81±0.28  | 4.39±0.46 | ****             | ####             |
|     | cd44      | 1    | 1.44±0.03  | 1.21±0.04 | n.s.             | n.s.             |
|     | osmr      | 1    | 1.62±0.02  | 2.26±0.05 | n.s.             | n.s.             |
|     | cp        | 1    | 7.75±0.27  | 6.67±1.03 | ****             | ####             |
|     | serpina3n | 1    | 1.64±0.07  | 1.79±0.01 | n.s.             | n.s.             |
|     | aspg      | 1    | 5.46±0.34  | 3.36±0.08 | ****             | ####             |
|     | gfap      | 1    | 5.54±0.92  | 4.82±0.52 | ****             | ####             |
|     |           |      |            |           |                  |                  |
| A1  | H2-T23    | 1    | 3.29±0.61  | 2.67±0.38 | ***              | ##               |
|     | Serpina1  | 1    | 0.76±0.02  | 1.70±0.2  | n.s.             | n.s.             |
|     | H2-D1     | 1    | 4.09±0.09  | 2.43±0.06 | ****             | **               |
|     | Ggta1     | 1    | 4.82±0.71  | 2.20±0.04 | ****             | n.s.             |
|     | Ligp1     | 1    | 0.75±0.04  | 1.15±0.02 | n.s.             | n.s.             |
|     | Gbp2      | 1    | 0.78±0.03  | 0.68±0.02 | n.s.             | n.s.             |

|    |         |   |           |           |      |      |
|----|---------|---|-----------|-----------|------|------|
|    | Fbln5   | 1 | 4.27±0.12 | 6.25±0.93 | **** | #### |
|    | Ugt1a   | 1 | 3.32±0.07 | 3.54±0.05 | **** | #### |
|    | Fkbp5   | 1 | 3.61±0.18 | 2.38±0.07 | **** | ##   |
|    | Psmb8   | 1 | 1.09±0.02 | 1.18±0.03 | n.s. | n.s. |
|    | Srgn    | 1 | 4.18±0.85 | 3.13±0.0  | **** | #### |
| A2 | Clcf1   | 1 | 0.98±0.02 | 1.30±0.04 | n.s. | n.s. |
|    | Tgm1    | 1 | 2.11±0.04 | 1.62±0.19 | ***  | n.s. |
|    | Ptx3    | 1 | 0.62±0.02 | 1.07±0.07 | n.s. | n.s. |
|    | S100a10 | 1 | 0.72±0.03 | 1.32±0.04 | n.s. | n.s. |
|    | Sphk1   | 1 | 4.53±0.08 | 1.59±0.10 | **** | n.s. |
|    | Cd109   | 1 | 0.63±0.04 | 0.77±0.03 | n.s. | n.s. |
|    | Ptgs2   | 1 | 0.54±0.03 | 0.49±0.01 | n.s. | n.s. |
|    | Emp1    | 1 | 1.12±0.03 | 1.63±0.02 | n.s. | n.s. |
|    | Slc10a6 | 1 | 1.33±0.03 | 4.49±0.05 | n.s. | #### |
|    | Tm4sf1  | 1 | 0.86±0.02 | 1.56±0.03 | n.s. | n.s. |
|    | Cd14    | 1 | 0.77±0.05 | 0.65±0.02 | n.s. | n.s. |

Renal IR induced markers of proinflammatory cytokines and astrocytes, center values represent mean  $\pm$  SEM (n=9 independent experiments). Two-way ANOVA followed by Bonferroni multiple comparison test was used for statistical significance. \* $p$  < 0.05, \*\* $p$  < 0.01, \*\*\* $p$  < 0.001, \*\*\*\* $p$  < 0.0001 vs. I/R24 h with Sham, # $P$  < 0.05, ## $p$  < 0.01, ### $p$  < 0.001, #### $p$  < 0.0001 vs. I/R 48 h with sham.

## Supplementary figures

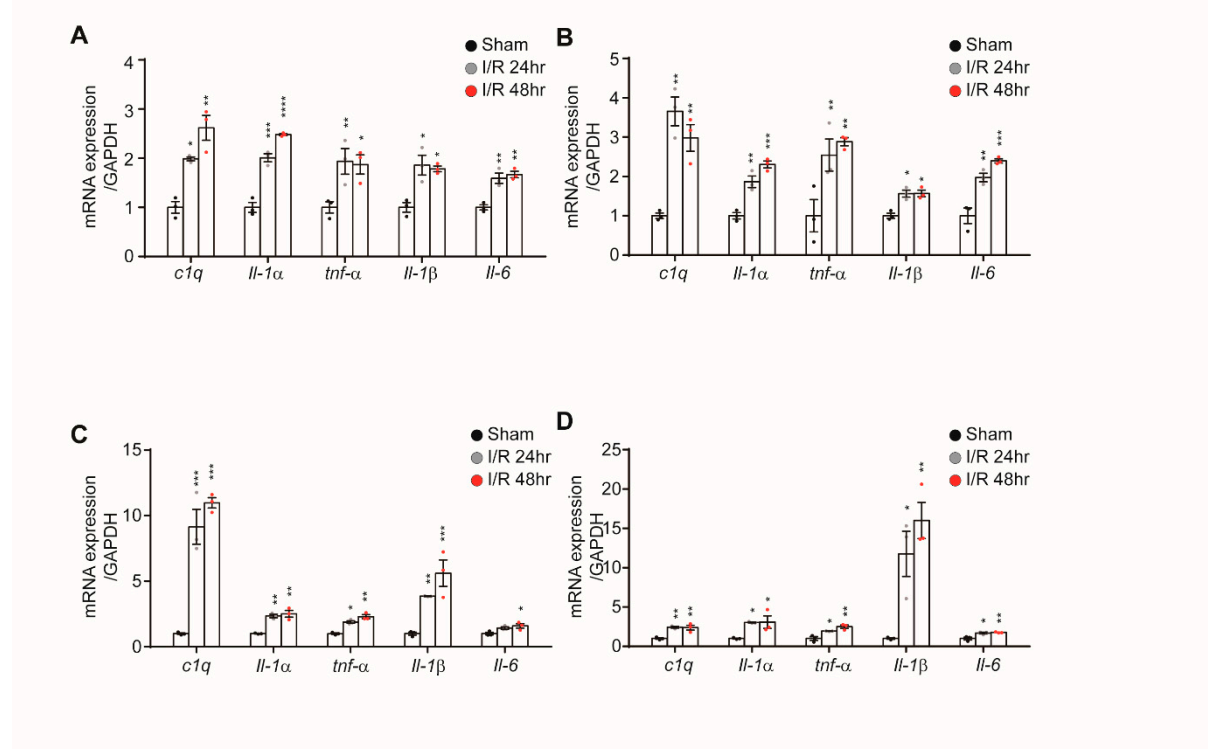

**Supplementary Figure S1.** The expression of inflammatory mediators (*C1q*, *Il1a*, *Il1b*, *Tnfa*, and *Il6*) were determined using quantitative qPCR analysis in RNA samples of stratum brain tissues. (A) Cytokine mRNA expression of STR region. (B) Cytokine mRNA expression of VM region. (C) Cytokine mRNA expression of HIP region. (D) Cytokine mRNA expression of CTX region. Values are represented as mean  $\pm$  S.E.M of independent mice. \* $p < 0.05$ , \*\* $p < 0.01$ , \*\*\* $p < 0.001$ , \*\*\*\* $p < 0.0001$  significant compare with sham group.

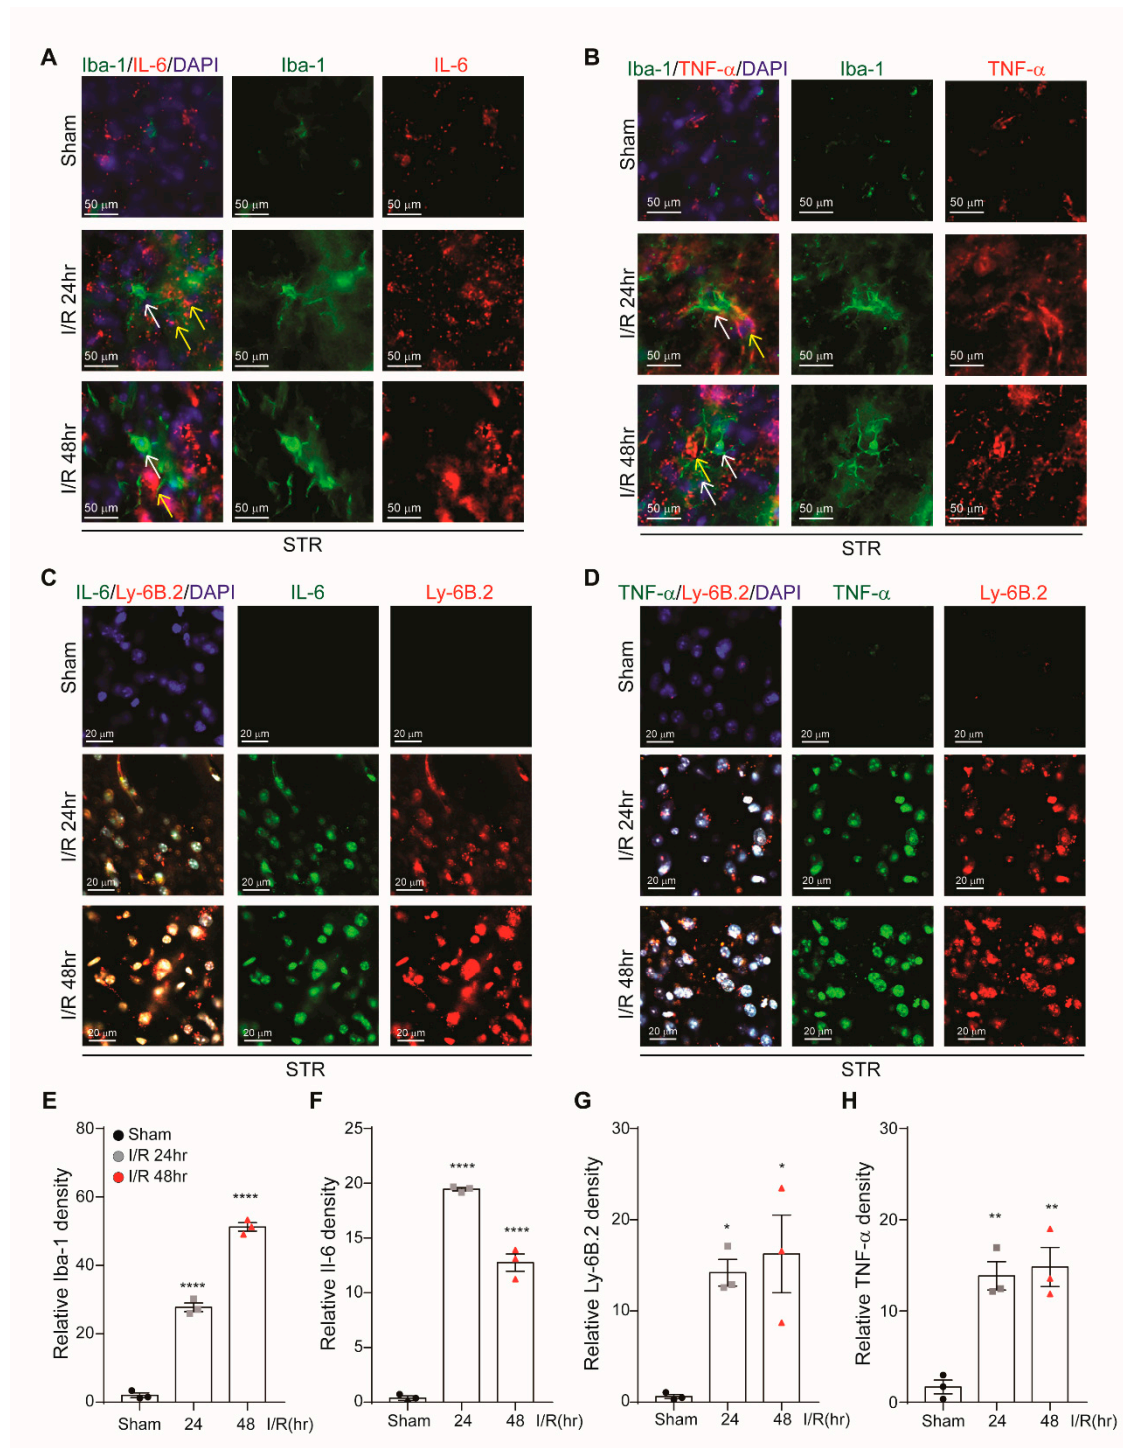

**Supplementary Figure S2.** Images and graphs of immunofluorescent (IF) colocalization of activated microglial and the cytokines in STR region. (A) Frozen brain tissues were dissected and then incubated with anti-Iba-1 and anti-IL-6 antibodies for IF staining ( $n = 3$ , biologically independent animals). (B) Frozen brain tissues were dissected and then incubated with anti-Iba-1 and anti-TNF- $\alpha$  antibodies for IF staining ( $n = 3$ , biologically independent animals). (C) Frozen brain tissues were dissected and then incubated with anti-IL-6 and anti-Ly-6B.2 antibodies for IF staining ( $n = 3$ , biologically independent animals). (D) Frozen brain tissues were dissected and then incubated with anti-IL-6 and anti-Ly-6B.2 antibodies for IF staining. (E-H) Graph of relative Iba-1, IL-6, Ly-6B.2 and TNF- $\alpha$  density, measuring using Image J. Values are represented as mean  $\pm$  S.E.M of independent mice. \* $p < 0.05$ , \*\* $p < 0.01$ , \*\*\* $p < 0.001$ , \*\*\*\* $p < 0.0001$  significant compare with sham group.

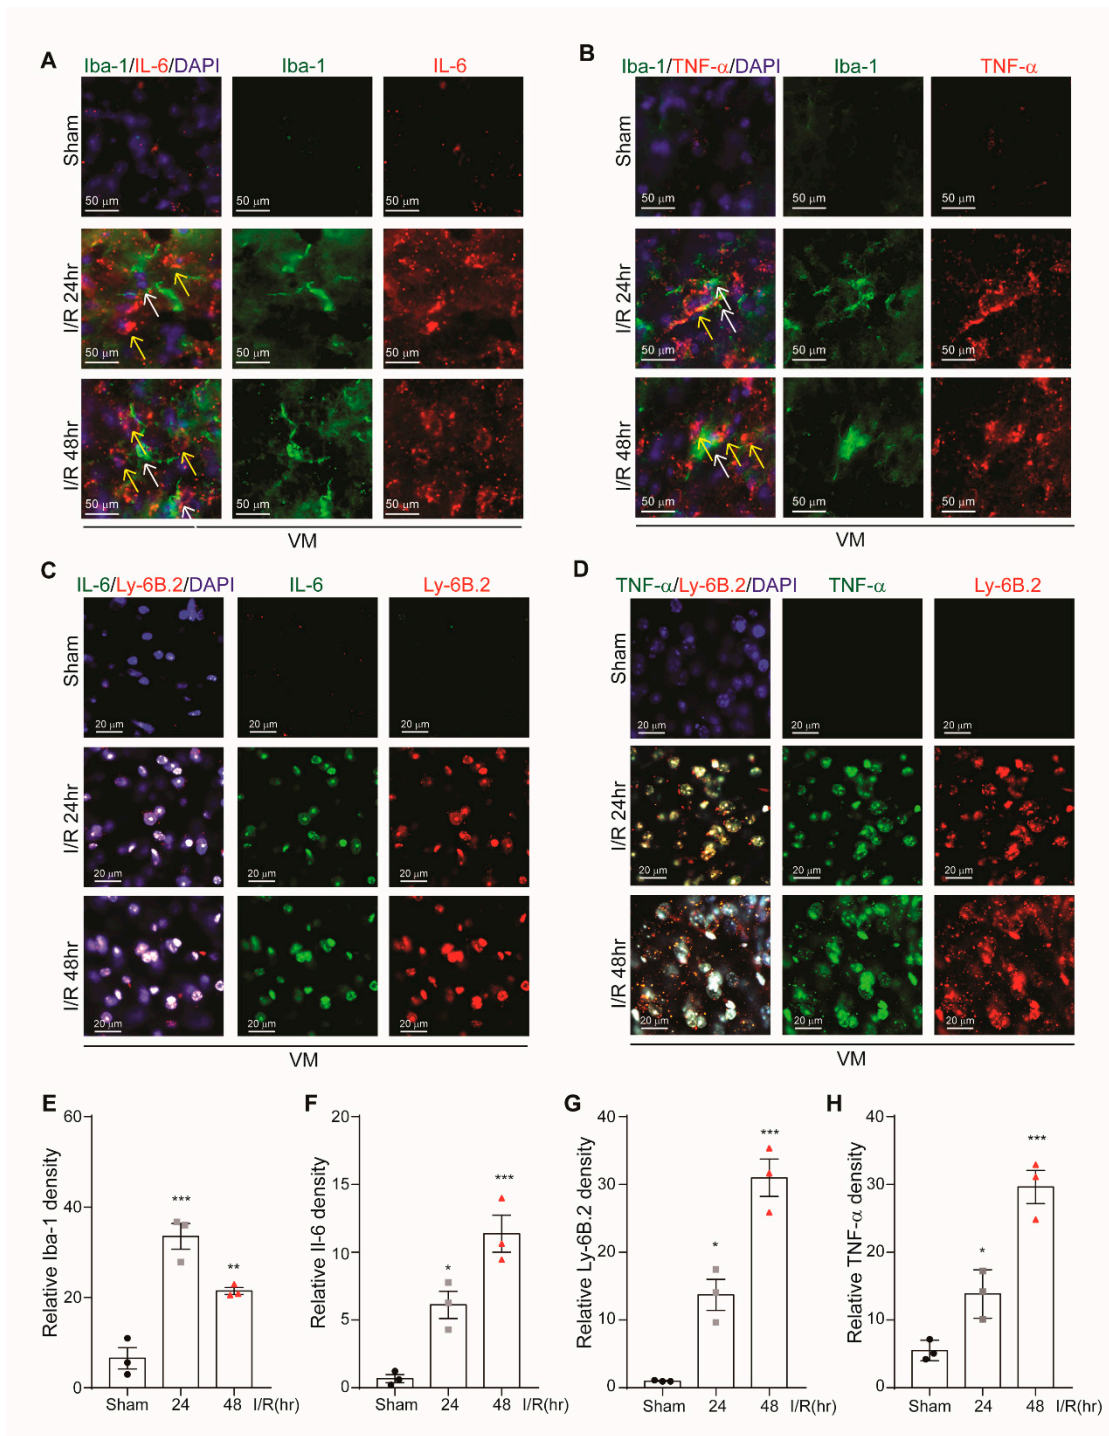

**Supplementary Figure S3.** Images and graphs of IF colocalization of activated microglial and the cytokines in VM region. (A) Frozen brain tissues were dissected and then incubated with anti-Iba-1 and anti-IL-6 antibodies for IF staining ( $n = 3$ , biologically independent animals). (B) Frozen brain tissues were dissected and then incubated with anti-Iba-1 and anti-TNF- $\alpha$  antibodies for IF staining ( $n = 3$ , biologically independent animals). (C) Frozen brain tissues were dissected and then incubated with anti-IL-6 and anti-Ly-6B.2 antibodies for IF staining ( $n = 3$ , biologically independent animals). (D) Frozen brain tissues were dissected and then incubated with anti-IL-6 and anti-Ly-6B.2 antibodies for IF staining. (E-H) Graph of relative Iba-1, IL-6, Ly-6B.2 and TNF- $\alpha$  density, measuring using Image J. Values are represented as mean  $\pm$  S.E.M of independent mice. \* $p < 0.05$ , \*\* $p < 0.01$ , \*\*\* $p < 0.001$ , \*\*\*\* $p < 0.0001$  significant compare with sham group.



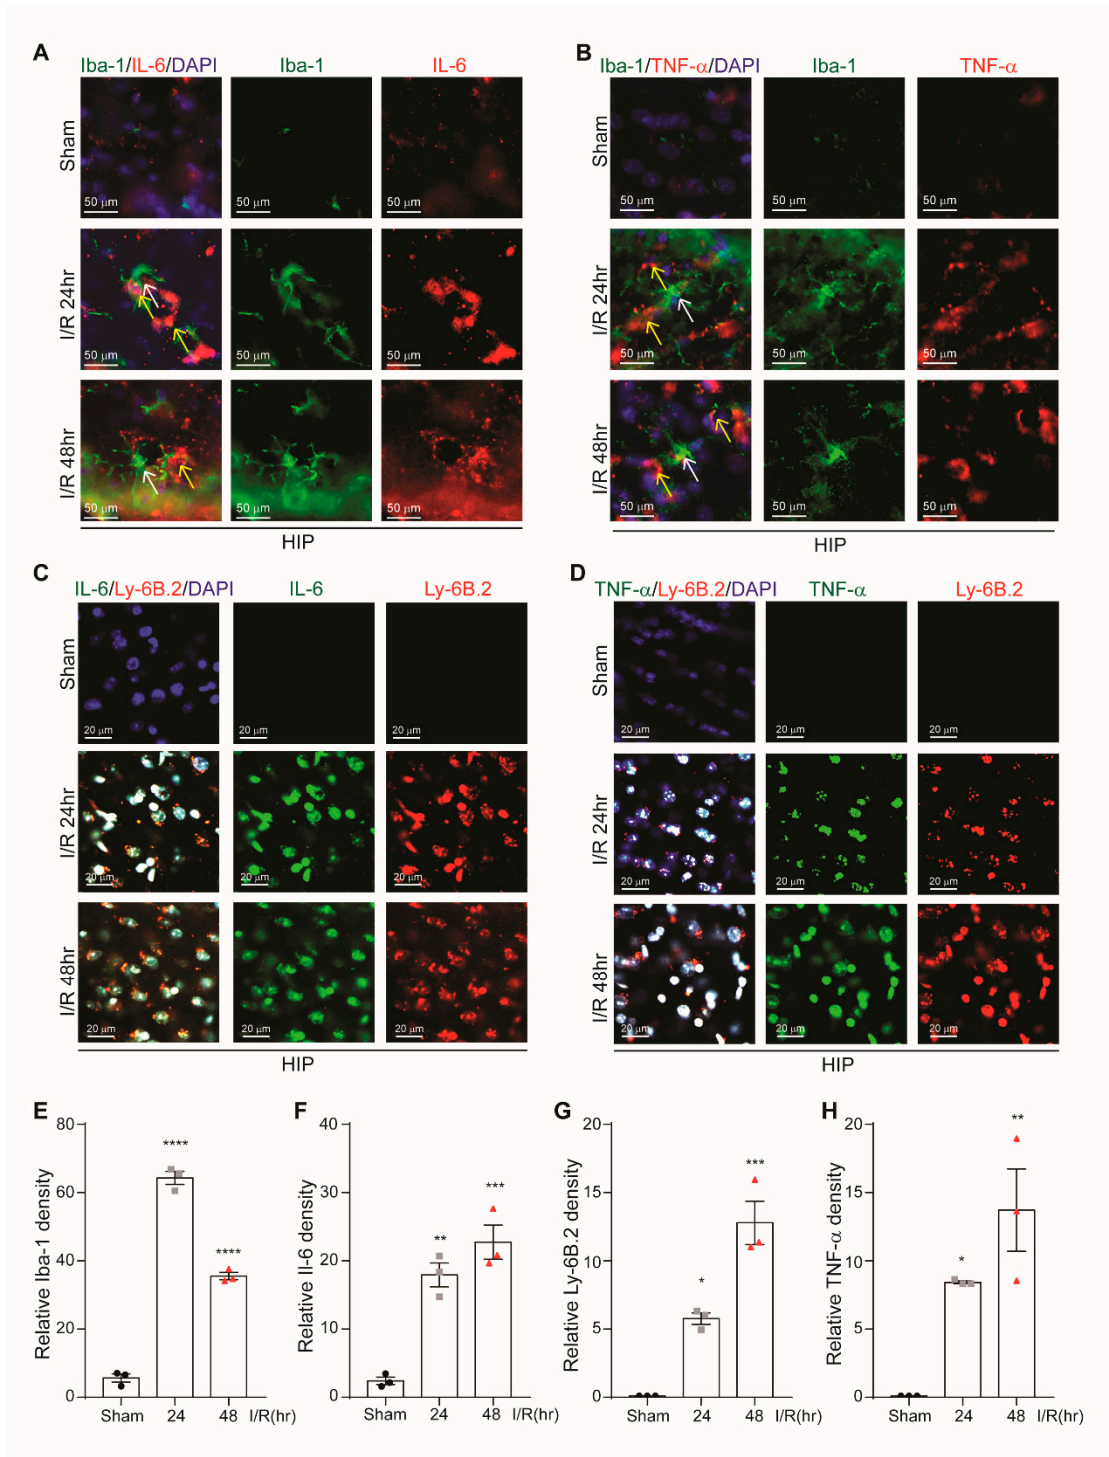

**Supplementary Figure S4.** Images and graphs of IF colocalization of activated microglial and the cytokines in HIP region. (A) Frozen brain tissues were dissected and then incubated with anti-Iba-1 and anti-IL-6 antibodies for IF staining ( $n = 3$ , biologically independent animals). (B) Frozen brain tissues were dissected and then incubated with anti-Iba-1 and anti-TNF- $\alpha$  antibodies for IF staining ( $n = 3$ , biologically independent animals). (C) Frozen brain tissues were dissected and then incubated with anti-IL-6 and anti-Ly-6B.2 antibodies for IF staining ( $n = 3$ , biologically independent animals). (D) Frozen brain tissues were dissected and then incubated with anti-IL-6 and anti-Ly-6B.2 antibodies for IF staining. (E-H) Graph of relative Iba-1, IL-6, Ly-6B.2 and TNF- $\alpha$  density, measuring using Image J. Values are represented as mean  $\pm$  S.E.M of independent mice. \* $p < 0.05$ , \*\* $p < 0.01$ , \*\*\* $p < 0.001$ , \*\*\*\* $p < 0.0001$  significant compare with sham group.



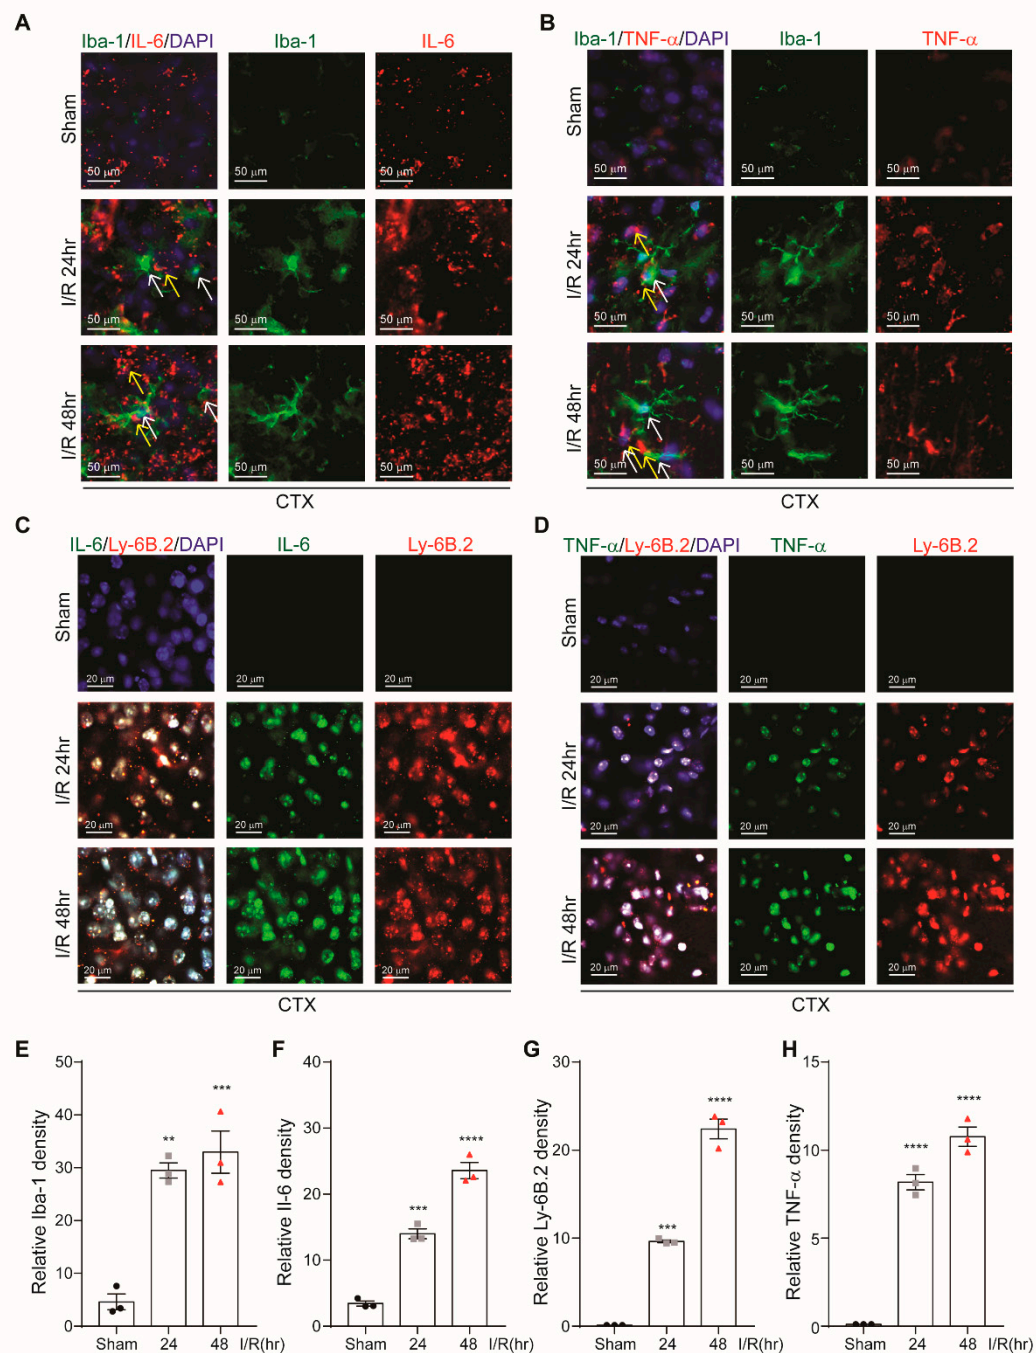

**Supplementary Figure S5.** Images and graphs of IF colocalization of activated microglial and the cytokines in CTX region. (A) Frozen brain tissues were dissected and then incubated with anti-Iba-1 and anti-IL-6 antibodies for IF staining ( $n = 3$ , biologically independent animals). (B) Frozen brain tissues were dissected and then incubated with anti-Iba-1 and anti-TNF- $\alpha$  antibodies for IF staining ( $n = 3$ , biologically independent animals). (C) Frozen brain tissues were dissected and then incubated with anti-IL-6 and anti-Ly-6B.2 antibodies for IF staining ( $n = 3$ , biologically independent animals). (D) Frozen brain tissues were dissected and then incubated with anti-IL-6 and anti-Ly-6B.2 antibodies for IF staining. (E-H) Graph of relative Iba-1, IL-6, Ly-6B.2 and TNF- $\alpha$  density, measuring using Image J. Values are represented as mean  $\pm$  S.E.M of independent mice. \* $p < 0.05$ , \*\* $p < 0.01$ , \*\*\* $p < 0.001$ , \*\*\*\* $p < 0.0001$  significant compare with sham group.

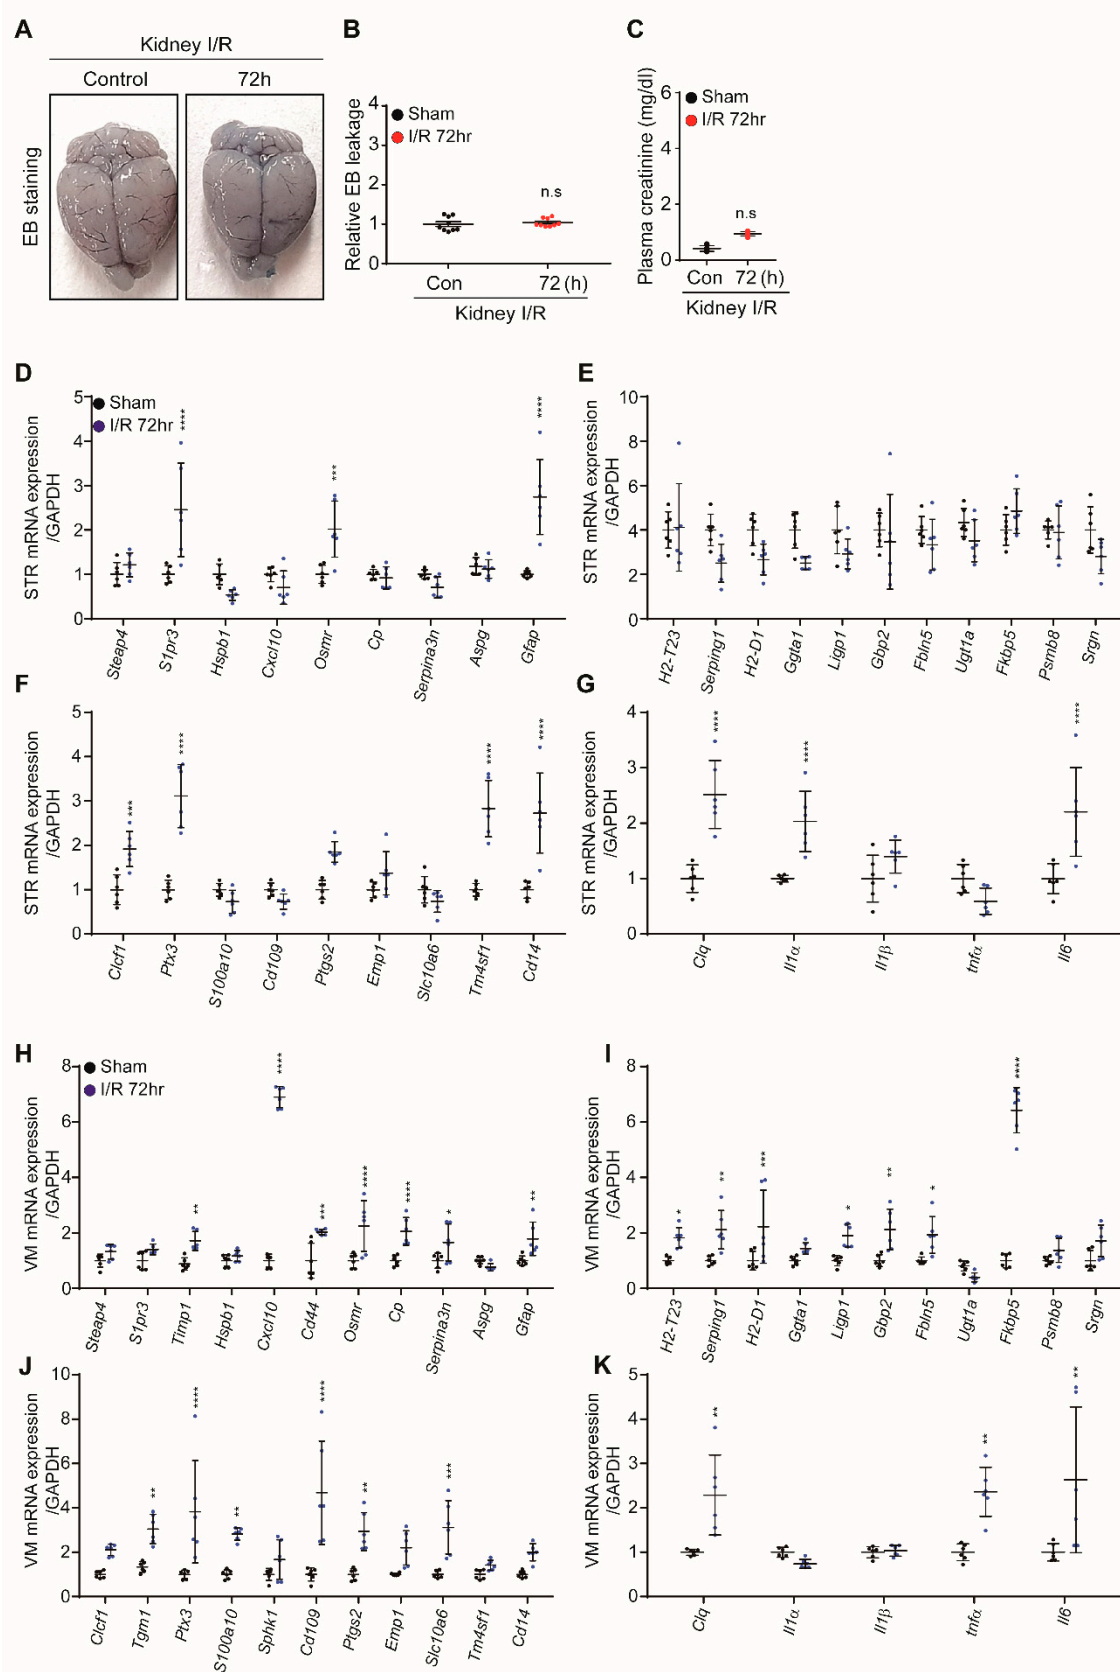

**Supplementary Figure S6.** Kidney IR injury impaired BBB permeability. (A) C57BL/6 mice sham (control) were operated, mice subjected to 25 min bilateral kidney IR and sacrificed at 72 h after reperfusion. (B) Relative EB

leakage levels in the brain samples. (C) Plasma creatinine level. The data represent the mean  $\pm$  S.E.M for nine mice from each group  $p < 0.005$  the significant compared with the sham group. (D-F) The gene markers of astrocytes; PAN-reactive transcripts, A1-specific transcripts, A2-specific transcripts, were examined using quantitative PCR analysis, in STR RNA samples respectively. (G) The expression of inflammatory mediators (C1q, Il1a, Il1b, Tnfa and Il6) were determined using quantitative qPCR analysis, in RNA samples of STR tissues. (H-J) The gene markers of astrocytes; PAN-reactive transcripts, A1-specific transcripts, A2-specific transcripts, were examined using quantitative PCR analysis, in VM RNA samples respectively. (K) The expression of inflammatory mediators (C1q, Il1a, Il1b, Tnfa and Il6) were determined using quantitative qPCR analysis, in RNA samples of VM tissues. Values are represented as mean  $\pm$  S.E.M of independent mice. \* $p < 0.05$ , \*\* $p < 0.01$ , \*\*\* $p < 0.001$ , \*\*\*\* $p < 0.0001$  significant compare with sham group.

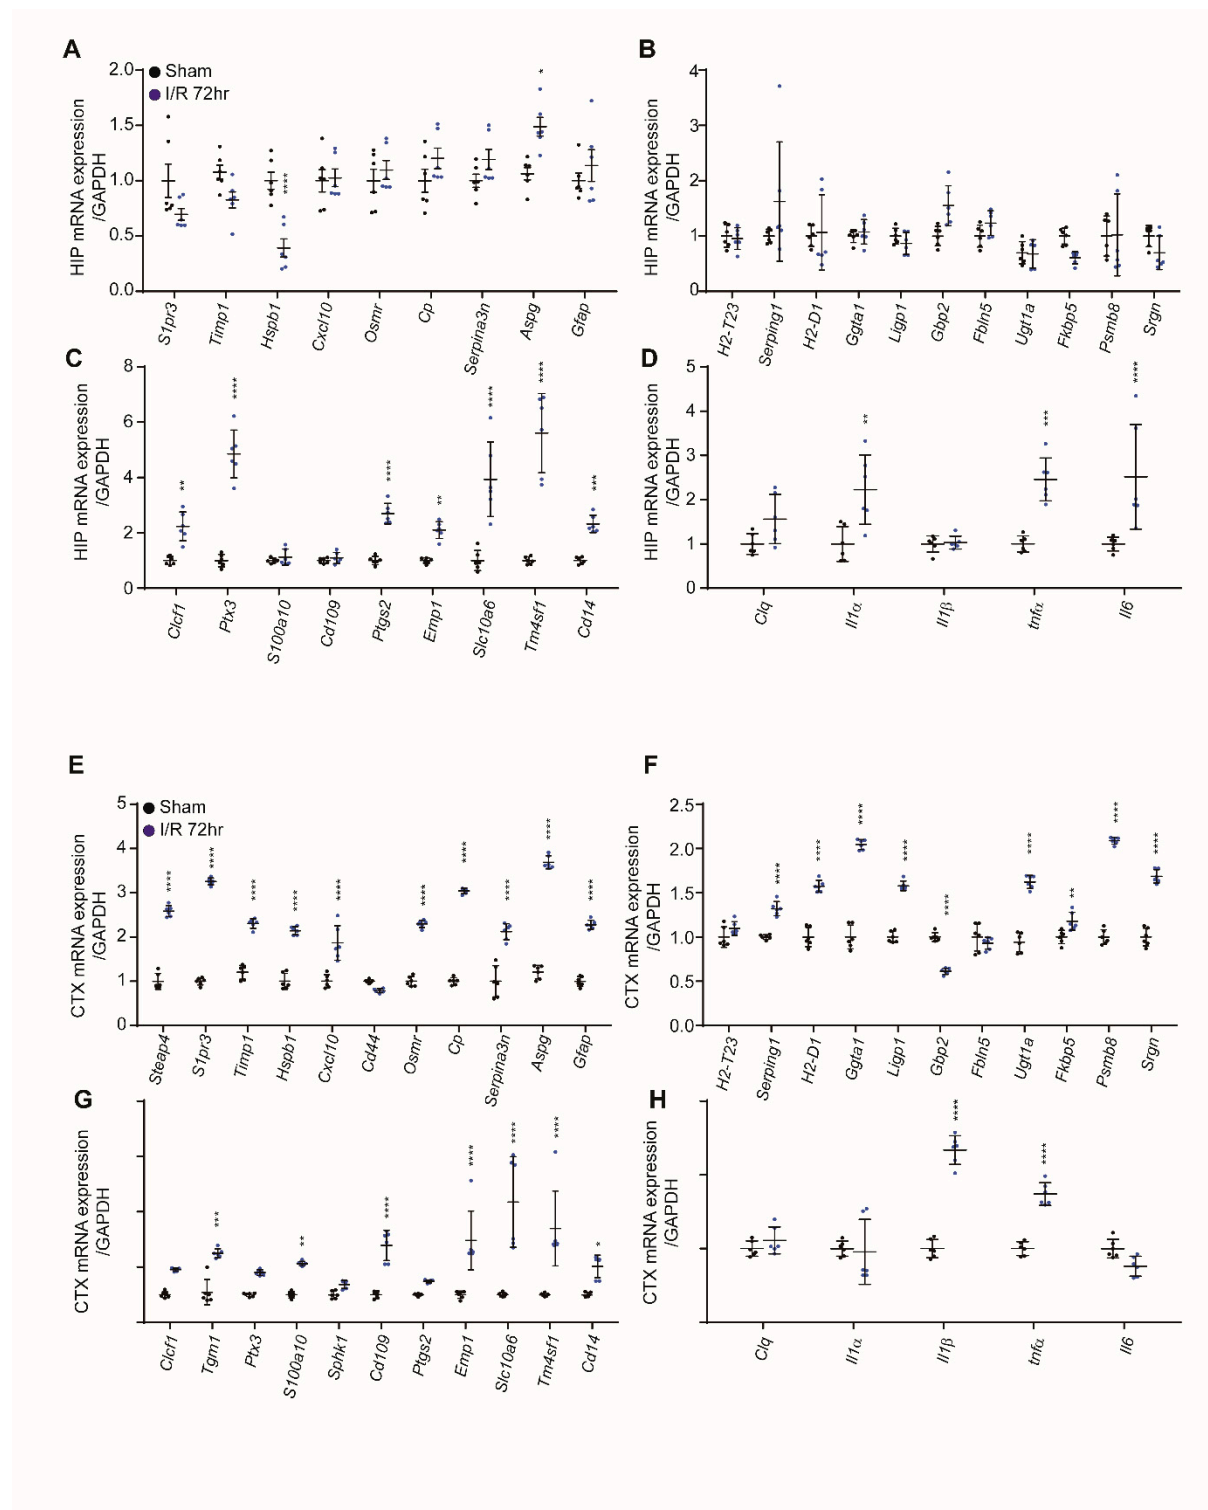

**Supplementary Figure S7.** Kidney IR injury impaired BBB permeability. (A-C) The gene markers of astrocytes; PAN-reactive transcripts, A1-specific transcripts, A2-specific transcripts, were examined using quantitative PCR analysis, in HIP RNA samples respectively. (D) The expression of inflammatory mediators (C1q, Il1a, Il1b, Tnfa and Il6) were determined using quantitative qPCR analysis, in RNA samples of HIP tissues. (E-G) The gene markers of astrocytes; PAN-reactive transcripts, A1-specific transcripts, A2-specific transcripts, were examined using quantitative PCR analysis, in CTX RNA samples respectively. (H) The expression of inflammatory mediators (C1q, Il1a, Il1b, Tnfa and Il6) were determined using quantitative qPCR analysis, in RNA samples of CTX tissues. Values are represented as mean  $\pm$  S.E.M of independent mice. \* $p < 0.05$ , \*\* $p < 0.01$ , \*\*\* $p < 0.001$ , \*\*\*\* $p < 0.0001$  significant compare with sham group.
